# Supplementary material for: Theoretical study on homolytic C(sp2)–O cleavage in ethers and phenols
Source: Royal Society of Chemistry journal article supplement (doi:10.1039/c5nj01354b), 2015-01-01
Supplement: c5nj01354b1.pdf [file c5nj01354b1.pdf]

## Electronic Supplementary Information (ESI)

*New Journal of Chemistry*

### Theoretical study on homolytic C(sp<sup>2</sup>)-O cleavage in ethers and phenols

Lanlan Ding, Wenrui Zheng\*, Yingxing Wang

College of Chemistry and Chemical Engineering, Shanghai University of  
Engineering Science, Shanghai 201620, China

Table S1. The 72 calculated C-O BDEs using 26 kinds of DFTs (kJ/mol)

| No. | compounds                                                     | Exp        | B3P86 | BMK   | M05   | BH&HLYP | B3LYP | M06-L |
|-----|---------------------------------------------------------------|------------|-------|-------|-------|---------|-------|-------|
| 1   | H <sub>3</sub> C-OCH <sub>3</sub>                             | 349.8±4.2  | 333.9 | 340.9 | 330.4 | 301.3   | 315.6 | 323.8 |
| 2   | H <sub>3</sub> C-OC <sub>2</sub> H <sub>5</sub>               | 348.1±4.2  | 352.5 | 358.4 | 349.1 | 318.7   | 333.7 | 344.3 |
| 3   | C <sub>2</sub> H <sub>5</sub> -OCH <sub>3</sub>               | 353.1±5.4  | 335.4 | 345.8 | 330.2 | 306.3   | 317.2 | 323.3 |
| 4   | C <sub>2</sub> H <sub>3</sub> -OC <sub>2</sub> H <sub>3</sub> | 326.8±10.5 | 314.1 | 320.3 | 292.9 | 288.7   | 295.8 | 296.4 |
| 5   | C <sub>2</sub> H <sub>5</sub> -OC <sub>2</sub> H <sub>3</sub> | 272.8±10.5 | 249.9 | 259.0 | 231.2 | 228.0   | 233.4 | 236.6 |
| 6   | C <sub>2</sub> H <sub>5</sub> -OC <sub>2</sub> H <sub>5</sub> | 355.6±6.3  | 353.5 | 362.4 | 348.8 | 323.3   | 334.9 | 343.4 |
| 7   | nC <sub>3</sub> H <sub>7</sub> -OCH <sub>3</sub>              | 356.5±6.3  | 328.7 | 339.7 | 323.6 | 279.0   | 309.9 | 318.2 |
| 8   | H <sub>3</sub> C-OiC <sub>3</sub> H <sub>7</sub>              | 350.2±6.3  | 331.2 | 338.8 | 327.6 | 299.5   | 311.9 | 325.2 |
| 9   | iC <sub>3</sub> H <sub>7</sub> -OCH <sub>3</sub>              | 358.6±4.2  | 327.9 | 342.1 | 320.3 | 300.9   | 309.1 | 316.3 |
| 10  | C <sub>2</sub> H <sub>5</sub> -OC <sub>3</sub> H <sub>7</sub> | 358.4±8.4  | 332.0 | 342.7 | 327.0 | 304.6   | 313.8 | 320.3 |
| 11  | C <sub>3</sub> H <sub>7</sub> -OC <sub>2</sub> H <sub>5</sub> | 355.2±8.4  | 353.3 | 362.5 | 348.9 | 323.2   | 334.5 | 344.0 |
| 12  | C <sub>3</sub> H <sub>7</sub> -OC <sub>2</sub> H <sub>3</sub> | 274.1±10.5 | 249.7 | 258.8 | 231.3 | 228.0   | 233.0 | 237.0 |
| 13  | C <sub>4</sub> H <sub>9</sub> -OCH <sub>3</sub>               | 343.9±6.3  | 332.4 | 343.0 | 327.8 | 303.4   | 296.8 | 323.1 |
| 14  | H <sub>3</sub> C-OC <sub>4</sub> H <sub>9</sub>               | 353.1±6.3  | 331.9 | 339.4 | 328.6 | 301.1   | 313.5 | 323.0 |
| 15  | C <sub>2</sub> H <sub>5</sub> O-C <sub>3</sub> H <sub>7</sub> | 356.9±6.3  | 353.3 | 362.5 | 348.9 | 323.2   | 334.5 | 344.0 |
| 16  | C <sub>2</sub> H <sub>3</sub> -OC <sub>4</sub> H <sub>9</sub> | 419.2±8.4  | 405.0 | 411.7 | 398.3 | 374.5   | 385.5 | 388.0 |

\* Corresponding author. Tel.: +86 21 67791216; fax: +86 21 67791220.  
E-mail address: wrzheng@sues.edu.cn (W.R. Zheng).

|    |                                                                                     |                  |       |       |       |       |       |       |
|----|-------------------------------------------------------------------------------------|------------------|-------|-------|-------|-------|-------|-------|
| 17 | $C_4H_9-OC_2H_5$                                                                    | $273.2 \pm 10.5$ | 253.3 | 262.3 | 235.0 | 231.8 | 219.7 | 241.1 |
| 18 | $tC_4H_9-OC_2H_5$                                                                   | $347.3 \pm 6.3$  | 332.7 | 350.8 | 322.6 | 305.9 | 312.1 | 326.3 |
| 19 | $C_2H_5-OtC_4H_9$                                                                   | $349.6 \pm 6.3$  | 325.5 | 336.2 | 319.3 | 296.1 | 305.0 | 321.5 |
| 20 | $sC_4H_9-OnC_4H_9$                                                                  | $348.2 \pm 8.4$  | 337.4 | 347.3 | 370.0 | 360.3 | 319.0 | 326.1 |
| 21 | $sC_4H_9-OsC_4H_9$                                                                  | $359.4 \pm 8.4$  | 315.3 | 336.2 | 363.1 | 340.4 | 297.8 | 317.9 |
| 22 | $tC_4H_9-OtC_4H_9$                                                                  | $324.7 \pm 8.4$  | 283.9 | 305.7 | 317.8 | 298.6 | 261.1 | 287.1 |
| 23 | $nC_4H_9-OtC_4H_9$                                                                  | $351.9 \pm 8.4$  | 326.3 | 366.8 | 371.5 | 344.7 | 305.4 | 323.5 |
| 24 | $nC_4H_9O-tC_4H_9$                                                                  | $348.1 \pm 8.4$  | 315.9 | 335.2 | 338.3 | 338.9 | 296.0 | 307.2 |
| 25 | $iC_4H_9-OtC_4H_9$                                                                  | $353.1 \pm 8.4$  | 226.3 | 377.6 | 317.9 | 344.3 | 304.9 | 325.5 |
| 26 | $nC_5H_{11}-OtC_4H_9$                                                               | $349.4 \pm 8.4$  | 322.8 | 333.5 | 367.3 | 340.1 | 301.5 | 321.5 |
| 27 | 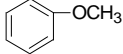   | $416.7 \pm 5.9$  | 407.5 | 416.1 | 462.9 | 436.3 | 386.2 | 392.8 |
| 28 |   | $268.6 \pm 7.1$  | 361.3 | 269.3 | 282.9 | 272.0 | 240.2 | 254.2 |
| 29 |  | 261.1            | 253.3 | 261.4 | 275.7 | 265.3 | 233.2 | 244.8 |
| 30 |  | 257.7            | 254.2 | 262.4 | 276.2 | 266.8 | 234.0 | 254.4 |
| 31 |  | 269.4            | 265.5 | 274.4 | 289.6 | 278.3 | 244.6 | 257.5 |
| 32 |  | 261.1            | 256.6 | 265.9 | 279.3 | 296.6 | 236.1 | 247.3 |
| 33 |  | 256.5            | 255.3 | 264.6 | 277.0 | 268.8 | 234.9 | 246.1 |
| 34 |  | 266.5            | 265.7 | 265.7 | 288.6 | 277.8 | 244.7 | 257.6 |
| 35 |  | 258.6            | 254.6 | 254.6 | 277.0 | 268.3 | 234.1 | 244.6 |
| 36 |  | 234.7            | 213.2 | 213.2 | 232.6 | 229.4 | 194.0 | 205.2 |
| 37 |  | 255.2            | 257.9 | 257.9 | 280.4 | 271.5 | 237.1 | 249.4 |
| 38 |  | 243.1            | 236.2 | 236.2 | 256.7 | 252.5 | 217.7 | 222.6 |

|    |                                                                                     |            |       |       |       |       |       |       |
|----|-------------------------------------------------------------------------------------|------------|-------|-------|-------|-------|-------|-------|
| 39 | 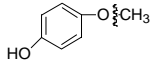   | 266.9      | 257.1 | 257.1 | 279.1 | 269.4 | 236.2 | 248.9 |
| 40 |    | 257.7      | 252.5 | 252.5 | 272.7 | 263.2 | 231.6 | 244.2 |
| 41 |    | 254.8      | 257.9 | 257.9 | 278.8 | 269.8 | 237.2 | 250.0 |
| 42 |    | 263.6      | 258.6 | 258.6 | 280.0 | 268.5 | 237.6 | 251.1 |
| 43 |    | 260.2      | 251.4 | 251.4 | 274.2 | 263.5 | 230.2 | 244.5 |
| 44 |    | 248.1      | 229.0 | 229.0 | 249.6 | 245.9 | 209.5 | 216.0 |
| 45 |    | 268.2      | 269.3 | 269.3 | 292.9 | 281.2 | 248.1 | 260.9 |
| 46 |    | 259.4      | 254.4 | 254.4 | 264.9 | 246.5 | 224.3 | 239.2 |
| 47 |  | 266.5      | 269.3 | 269.3 | 291.6 | 279.6 | 248.2 | 262.3 |
| 48 |  | 255.2      | 245.0 | 245.0 | 263.1 | 255.6 | 224.2 | 236.3 |
| 49 |  | 266.9      | 269.2 | 269.2 | 291.5 | 286.3 | 249.9 | 259.0 |
| 50 |  | 265.3      | 269.4 | 269.4 | 293.6 | 283.3 | 248.2 | 260.7 |
| 51 |  | 270.3      | 273.4 | 273.4 | 296.8 | 284.9 | 252.3 | 265.9 |
| 52 |  | 263.6      | 274.2 | 274.2 | 297.3 | 286.2 | 253.3 | 266.4 |
| 53 |  | 282.4      | 270.3 | 270.3 | 293.1 | 281.7 | 249.5 | 261.7 |
| 54 |  | 260.7      | 266.8 | 266.8 | 292.4 | 283.0 | 246.4 | 254.0 |
| 55 |  | 416.7±5.4  | 419.1 | 419.1 | 477.1 | 447.6 | 397.0 | 407.8 |
| 56 |  | 331.0±10.5 | 322.2 | 322.2 | 349.1 | 343.8 | 300.1 | 306.8 |

|    |  |             |       |       |       |       |       |       |
|----|--|-------------|-------|-------|-------|-------|-------|-------|
| 57 |  | 320.5 ±20.9 | 316.3 | 316.3 | 340.7 | 339.9 | 297.1 | 298.5 |
| 58 |  | 304.6 ±8.4  | 273.7 | 273.7 | 305.7 | 285.7 | 253.9 | 260.9 |
| 59 |  | 303.7 ±8.4  | 292.6 | 292.6 | 326.7 | 305.2 | 271.6 | 282.4 |
| 60 |  | 298.3 ±8.4  | 263.9 | 263.9 | 296.5 | 274.2 | 241.8 | 259.9 |
| 61 |  | 298.7 ±8.4  | 275.9 | 275.9 | 290.9 | 289.6 | 255.8 | 263.0 |
| 62 |  | 300.8 ±8.4  | 264.8 | 264.8 | 295.8 | 277.2 | 243.7 | 258.5 |
| 63 |  | 332.2 ±8.4  | 321.8 | 321.8 | 347.8 | 345.9 | 298.9 | 306.6 |
| 64 |  | 208.4 ±8.4  | 192.6 | 192.6 | 196.6 | 195.8 | 171.3 | 183.6 |
| 65 |  | 240.6       | 233.7 | 233.7 | 299.1 | 242.6 | 213.2 | 226.0 |
| 66 |  | 255.2       | 253.0 | 253.0 | 272.2 | 263.0 | 231.9 | 244.7 |
| 67 |  | 155         | 122.7 | 122.7 | 116.7 | 120.0 | 97.1  | 122.8 |
| 68 |  | 145         | 126.7 | 126.7 | 122.8 | 125.6 | 101.4 | 125.6 |
| 69 |  | 166         | 127.5 | 127.5 | 122.7 | 126.1 | 102.1 | 126.6 |
| 70 |  | 163         | 136.0 | 136.0 | 131.3 | 131.9 | 109.7 | 138.1 |
| 71 |  | 166         | 141.0 | 141.0 | 137.9 | 137.9 | 114.6 | 143.5 |
| 72 |  | 167         | 142.0 | 142.0 | 138.2 | 139.7 | 115.9 | 143.5 |

| No. | compounds                                                        | Exp        | TPSS1KCIS | B97-1 | B97-2 | B98   | wB97  | wB97X |
|-----|------------------------------------------------------------------|------------|-----------|-------|-------|-------|-------|-------|
| 1   | H <sub>3</sub> C-OCH <sub>3</sub>                                | 349.8±4.2  | 317.5     | 334.1 | 332.8 | 329.9 | 342.5 | 339.3 |
| 2   | H <sub>3</sub> C-OC <sub>2</sub> H <sub>5</sub>                  | 348.1±4.2  | 335.4     | 338.9 | 338.2 | 334.8 | 360.7 | 345.9 |
| 3   | C <sub>2</sub> H <sub>5</sub> -OCH <sub>3</sub>                  | 353.1±5.4  | 318.7     | 334.5 | 331.8 | 330.5 | 346.9 | 342.7 |
| 4   | C <sub>2</sub> H <sub>3</sub> -OC <sub>2</sub> H <sub>3</sub>    | 326.8±10.5 | 297.0     | 311.8 | 309.8 | 307.5 | 315.6 | 315.0 |
| 5   | C <sub>2</sub> H <sub>5</sub> -OC <sub>2</sub> H <sub>3</sub>    | 272.8±10.5 | 234.5     | 250.4 | 247.2 | 245.8 | 257.0 | 255.7 |
| 6   | C <sub>2</sub> H <sub>5</sub> -OC <sub>2</sub> H <sub>5</sub>    | 355.6±6.3  | 336.3     | 339.0 | 336.7 | 335.0 | 364.9 | 349.2 |
| 7   | nC <sub>3</sub> H <sub>7</sub> -OCH <sub>3</sub>                 | 356.5±6.3  | 311.8     | 328.1 | 324.8 | 323.9 | 341.9 | 337.3 |
| 8   | H <sub>3</sub> C-OiC <sub>3</sub> H <sub>7</sub>                 | 350.2±6.3  | 313.7     | 330.9 | 328.8 | 326.6 | 342.7 | 338.9 |
| 9   | iC <sub>3</sub> H <sub>7</sub> -OCH <sub>3</sub>                 | 358.6±4.2  | 310.4     | 326.5 | 321.4 | 322.4 | 344.7 | 339.0 |
| 10  | C <sub>2</sub> H <sub>5</sub> -OC <sub>3</sub> H <sub>7</sub>    | 358.4±8.4  | 315.3     | 331.1 | 328.4 | 327.2 | 344.4 | 340.1 |
| 11  | C <sub>3</sub> H <sub>7</sub> -OC <sub>2</sub> H <sub>5</sub>    | 355.2±8.4  | 335.8     | 328.8 | 336.5 | 334.8 | 365.4 | 349.5 |
| 12  | C <sub>3</sub> H <sub>7</sub> -OC <sub>2</sub> H <sub>3</sub>    | 274.1±10.5 | 234.1     | 250.2 | 247.1 | 254.6 | 257.6 | 256.1 |
| 13  | C <sub>4</sub> H <sub>9</sub> -OCH <sub>3</sub>                  | 343.9±6.3  | 314.8     | 331.4 | 328.2 | 327.2 | 346.2 | 341.5 |
| 14  | H <sub>3</sub> C-OC <sub>4</sub> H <sub>9</sub>                  | 353.1±6.3  | 315.3     | 331.9 | 330.6 | 327.8 | 342.0 | 338.6 |
| 15  | C <sub>2</sub> H <sub>5</sub> O-C <sub>3</sub> H <sub>7</sub>    | 356.9±6.3  | 335.8     | 338.8 | 336.5 | 334.8 | 365.4 | 349.5 |
| 16  | C <sub>2</sub> H <sub>3</sub> -OC <sub>4</sub> H <sub>9</sub>    | 419.2±8.4  | 386.9     | 401.2 | 400.3 | 397.7 | 411.3 | 408.1 |
| 17  | C <sub>4</sub> H <sub>9</sub> -OC <sub>2</sub> H <sub>3</sub>    | 273.2±10.5 | 237.1     | 253.4 | 250.4 | 248.8 | 261.6 | 260.0 |
| 18  | tC <sub>4</sub> H <sub>9</sub> -OC <sub>2</sub> H <sub>5</sub>   | 347.3±6.3  | 313.2     | 317.1 | 309.8 | 312.7 | 355.8 | 336.7 |
| 19  | C <sub>2</sub> H <sub>5</sub> -OtC <sub>4</sub> H <sub>9</sub>   | 349.6±6.3  | 306.2     | 323.3 | 319.2 | 318.8 | 342.4 | 336.8 |
| 20  | sC <sub>4</sub> H <sub>9</sub> -OnC <sub>4</sub> H <sub>9</sub>  | 348.2±8.4  | 370.8     | 335.9 | 333.8 | 332.0 | 350.8 | 346.4 |
| 21  | sC <sub>4</sub> H <sub>9</sub> -OsC <sub>4</sub> H <sub>9</sub>  | 359.4±8.4  | 347.3     | 318.0 | 309.9 | 313.1 | 344.1 | 336.8 |
| 22  | tC <sub>4</sub> H <sub>9</sub> -OtC <sub>4</sub> H <sub>9</sub>  | 324.7±8.4  | 304.4     | 271.6 | 270.7 | 276.2 | 315.5 | 290.0 |
| 23  | nC <sub>4</sub> H <sub>9</sub> -OtC <sub>4</sub> H <sub>9</sub>  | 351.9±8.4  | 354.9     | 323.7 | 319.8 | 319.2 | 344.4 | 338.6 |
| 24  | nC <sub>4</sub> H <sub>9</sub> O-tC <sub>4</sub> H <sub>9</sub>  | 348.1±8.4  | 344.2     | 313.7 | 306.4 | 309.5 | 339.8 | 316.5 |
| 25  | iC <sub>4</sub> H <sub>9</sub> -OtC <sub>4</sub> H <sub>9</sub>  | 353.1±8.4  | 354.9     | 324.1 | 319.5 | 319.4 | 345.8 | 339.7 |
| 26  | nC <sub>5</sub> H <sub>11</sub> -OtC <sub>4</sub> H <sub>9</sub> | 349.4±8.4  | 350.6     | 320.3 | 315.8 | 315.6 | 342.1 | 336.1 |

|    |                                                                                     |           |       |       |       |       |       |       |
|----|-------------------------------------------------------------------------------------|-----------|-------|-------|-------|-------|-------|-------|
| 27 | 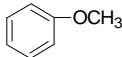   | 416.7±5.9 | 448.5 | 402.7 | 400.1 | 398.9 | 417.6 | 413.1 |
| 28 |    | 268.6±7.1 | 284.3 | 259.1 | 257.5 | 254.5 | 267.2 | 266.6 |
| 29 |    | 261.1     | 275.6 | 241.2 | 249.6 | 246.8 | 260.2 | 259.4 |
| 30 |    | 257.7     | 276.5 | 252.0 | 250.3 | 247.6 | 261.0 | 260.1 |
| 31 |    | 269.4     | 289.1 | 263.3 | 261.8 | 258.8 | 273.2 | 272.2 |
| 32 |    | 261.1     | 279.2 | 254.7 | 252.8 | 250.3 | 264.3 | 263.6 |
| 33 |    | 256.5     | 277.6 | 253.4 | 251.3 | 249.1 | 263.0 | 262.2 |
| 34 |    | 266.5     | 289.2 | 263.5 | 261.9 | 259.0 | 272.4 | 271.6 |
| 35 |  | 258.6     | 276.7 | 252.5 | 250.6 | 248.2 | 262.6 | 261.9 |
| 36 |  | 234.7     | 229.8 | 212.3 | 210.1 | 208.1 | 224.9 | 222.7 |
| 37 |  | 255.2     | 280.1 | 256.1 | 254.4 | 251.6 | 267.0 | 265.7 |
| 38 |  | 243.1     | 256.0 | 235.0 | 232.8 | 230.9 | 246.1 | 245.0 |
| 39 |  | 266.9     | 279.4 | 255.0 | 253.5 | 231.1 | 265.1 | 264.0 |
| 40 |  | 257.7     | 274.7 | 250.4 | 248.8 | 245.9 | 258.9 | 258.2 |
| 41 |  | 254.8     | 281.1 | 256.0 | 254.0 | 251.4 | 264.4 | 263.5 |
| 42 |  | 263.6     | 281.2 | 256.5 | 255.2 | 251.9 | 265.1 | 264.4 |
| 43 |  | 260.2     | 272.3 | 248.7 | 247.3 | 244.3 | 258.0 | 257.4 |
| 44 |  | 248.1     | 246.5 | 227.7 | 226.3 | 223.7 | 239.0 | 238.5 |

|    |  |            |       |       |       |       |       |       |
|----|--|------------|-------|-------|-------|-------|-------|-------|
| 45 |  | 268.2      | 293.6 | 266.8 | 265.5 | 262.3 | 274.0 | 273.5 |
| 46 |  | 259.4      | 266.5 | 243.5 | 242.2 | 238.8 | 249.9 | 249.5 |
| 47 |  | 266.5      | 293.5 | 267.0 | 265.3 | 262.4 | 273.8 | 273.3 |
| 48 |  | 255.2      | 265.6 | 243.1 | 241.2 | 238.5 | 253.4 | 252.6 |
| 49 |  | 266.9      | 293.4 | 269.1 | 266.2 | 263.2 | 263.8 | 276.3 |
| 50 |  | 265.3      | 293.3 | 266.9 | 265.4 | 262.5 | 276.4 | 275.6 |
| 51 |  | 270.3      | 298.0 | 271.1 | 269.5 | 266.6 | 278.3 | 277.8 |
| 52 |  | 263.6      | 299.0 | 271.9 | 270.1 | 267.4 | 278.9 | 278.4 |
| 53 |  | 282.4      | 295.0 | 268.0 | 266.2 | 263.5 | 275.5 | 274.9 |
| 54 |  | 260.7      | 290.0 | 264.5 | 262.1 | 260.2 | 275.1 | 274.0 |
| 55 |  | 416.7±5.4  | 461.4 | 298.2 | 398.2 | 376.9 | 430.5 | 414.1 |
| 56 |  | 331.0±10.5 | 353.0 | 316.8 | 315.0 | 312.7 | 325.5 | 324.8 |
| 57 |  | 320.5±20.9 | 344.1 | 313.1 | 310.1 | 308.8 | 322.0 | 320.4 |
| 58 |  | 304.6±8.4  | 297.3 | 271.1 | 265.4 | 267.5 | 292.9 | 287.9 |
| 59 |  | 303.7±8.4  | 318.4 | 276.5 | 270.9 | 272.7 | 312.4 | 295.7 |
| 60 |  | 298.3±8.4  | 285.4 | 261.5 | 253.9 | 257.4 | 289.1 | 282.9 |
| 61 |  | 298.7±8.4  | 299.5 | 273.1 | 267.5 | 269.6 | 296.4 | 291.2 |
| 62 |  | 300.8±8.4  | 285.9 | 262.4 | 255.2 | 258.5 | 289.2 | 283.5 |
| 63 |  | 332.2±8.4  | 350.0 | 315.5 | 313.2 | 311.6 | 329.8 | 328.1 |

|    |                                                                                     |           |       |       |       |       |       |       |
|----|-------------------------------------------------------------------------------------|-----------|-------|-------|-------|-------|-------|-------|
| 64 | 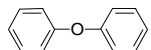   | 208.4±8.4 | 204.8 | 188.4 | 184.3 | 184.3 | 204.0 | 202.2 |
| 65 |    | 240.6     | 263.0 | 231.9 | 229.7 | 227.3 | 239.0 | 238.6 |
| 66 |    | 255.2     | 274.7 | 250.7 | 249.1 | 246.2 | 258.2 | 258.1 |
| 67 |    | 155       | 120.4 | 118.3 | 106.8 | 113.6 | 157.7 | 152.0 |
| 68 |    | 145       | 125.1 | 122.3 | 110.9 | 117.8 | 138.9 | 156.6 |
| 69 |    | 166       | 125.9 | 123.2 | 111.6 | 118.6 | 162.5 | 156.8 |
| 70 |    | 163       | 135.5 | 130.6 | 119.3 | 125.9 | 168.9 | 162.9 |
| 71 |   | 166       | 141.1 | 135.5 | 124.4 | 130.8 | 174.4 | 168.3 |
| 72 |  | 167       | 142.2 | 136.5 | 125.2 | 132.0 | 174.8 | 168.8 |

| No. | compounds                                                     | Exp        | wB97X-D | PBE1PBE | MPW1P86 | MPW1B95 | MPWCIS1K |
|-----|---------------------------------------------------------------|------------|---------|---------|---------|---------|----------|
| 1   | H <sub>3</sub> C-OCH <sub>3</sub>                             | 349.8±4.2  | 337.4   | 328.7   | 331.1   | 341.0   | 319.5    |
| 2   | H <sub>3</sub> C-OC <sub>2</sub> H <sub>5</sub>               | 348.1±4.2  | 344.0   | 346.3   | 349.5   | 359.3   | 337.7    |
| 3   | C <sub>2</sub> H <sub>5</sub> -OCH <sub>3</sub>               | 353.1±5.4  | 341.2   | 330.3   | 333.7   | 342.9   | 322.3    |
| 4   | C <sub>2</sub> H <sub>3</sub> -OC <sub>2</sub> H <sub>3</sub> | 326.8±10.5 | 314.6   | 310.5   | 313.2   | 324.2   | 305.2    |
| 5   | C <sub>2</sub> H <sub>5</sub> -OC <sub>2</sub> H <sub>3</sub> | 272.8±10.5 | 255.3   | 247.1   | 249.9   | 262.5   | 241.9    |
| 6   | C <sub>2</sub> H <sub>5</sub> -OC <sub>2</sub> H <sub>5</sub> | 355.6±6.3  | 348.1   | 348.3   | 351.7   | 360.7   | 340.1    |
| 7   | nC <sub>3</sub> H <sub>7</sub> -OCH <sub>3</sub>              | 356.5±6.3  | 337.1   | 323.6   | 327.1   | 336.5   | 315.2    |
| 8   | H <sub>3</sub> C-OiC <sub>3</sub> H <sub>7</sub>              | 350.2±6.3  | 338.1   | 355.5   | 329.2   | 339.2   | 317.2    |
| 9   | iC <sub>3</sub> H <sub>7</sub> -OCH <sub>3</sub>              | 358.6±4.2  | 338.2   | 323.4   | 327.5   | 336.3   | 314.8    |
| 10  | C <sub>2</sub> H <sub>5</sub> -OC <sub>3</sub> H <sub>7</sub> | 358.4±8.4  | 339.8   | 327.2   | 330.6   | 339.6   | 319.8    |



|    |                                                                                     |                  |       |       |       |       |       |
|----|-------------------------------------------------------------------------------------|------------------|-------|-------|-------|-------|-------|
| 11 | $C_3H_7-OC_2H_5$                                                                    | $355.2 \pm 8.4$  | 349.0 | 348.2 | 351.5 | 360.6 | 340.1 |
| 12 | $C_3H_7-OC_2H_3$                                                                    | $274.1 \pm 10.5$ | 256.4 | 247.0 | 249.8 | 262.5 | 242.0 |
| 13 | $C_4H_9-OCH_3$                                                                      | $343.9 \pm 6.3$  | 341.0 | 327.7 | 331.0 | 340.6 | 319.6 |
| 14 | $H_3C-OC_4H_9$                                                                      | $353.1 \pm 6.3$  | 337.2 | 336.2 | 329.6 | 339.4 | 318.5 |
| 15 | $C_2H_5O-C_3H_7$                                                                    | $356.9 \pm 6.3$  | 349.0 | 348.2 | 351.5 | 360.6 | 340.1 |
| 16 | $C_2H_3-OC_4H_9$                                                                    | $419.2 \pm 8.4$  | 407.4 | 399.4 | 402.6 | 409.4 | 392.2 |
| 17 | $C_4H_9-OC_2H_3$                                                                    | $273.2 \pm 10.5$ | 260.1 | 250.8 | 253.5 | 266.2 | 246.0 |
| 18 | $tC_4H_9-OC_2H_5$                                                                   | $347.3 \pm 6.3$  | 336.9 | 328.3 | 333.3 | 342.3 | 318.6 |
| 19 | $C_2H_5-OtC_4H_9$                                                                   | $349.6 \pm 6.3$  | 362.6 | 321.0 | 324.9 | 334.6 | 312.7 |
| 20 | $sC_4H_9-OnC_4H_9$                                                                  | $348.2 \pm 8.4$  | 345.9 | 333.0 | 336.2 | 345.1 | 378.2 |
| 21 | $sC_4H_9-OC_4H_9$                                                                   | $359.4 \pm 8.4$  | 341.1 | 315.3 | 319.9 | 344.4 | 354.8 |
| 22 | $tC_4H_9-OtC_4H_9$                                                                  | $324.7 \pm 8.4$  | 335.1 | 280.3 | 335.1 | 298.1 | 275.0 |
| 23 | $nC_4H_9-OtC_4H_9$                                                                  | $351.9 \pm 8.4$  | 365.1 | 322.2 | 375.8 | 335.6 | 364.2 |
| 24 | $nC_4H_9O-tC_4H_9$                                                                  | $348.1 \pm 8.4$  | 332.8 | 312.0 | 315.8 | 325.9 | 314.6 |
| 25 | $iC_4H_9-OtC_4H_9$                                                                  | $353.1 \pm 8.4$  | 367.3 | 322.2 | 457.7 | 336.4 | 363.7 |
| 26 | $nC_5H_{11}-OtC_4H_9$                                                               | $349.4 \pm 8.4$  | 363.6 | 318.7 | 346.2 | 332.5 | 359.7 |
| 27 | 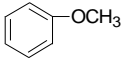 | $416.7 \pm 5.9$  | 413.2 | 401.1 | 405.8 | 413.2 | 465.9 |
| 28 |  | $268.6 \pm 7.1$  | 280.5 | 259.4 | 261.3 | 274.1 | 293.8 |
| 29 |  | 261.1            | 273.0 | 251.7 | 253.7 | 266.1 | 285.6 |
| 30 |  | 257.7            | 273.6 | 252.5 | 254.5 | 267.4 | 286.7 |
| 31 |  | 269.4            | 285.7 | 263.8 | 265.7 | 278.9 | 299.6 |
| 32 |  | 261.1            | 277.3 | 255.1 | 257.0 | 269.6 | 289.7 |
| 33 |  | 256.5            | 275.9 | 253.9 | 256.0 | 268.5 | 288.3 |
| 34 |  | 266.5            | 285.2 | 263.9 | 265.8 | 278.8 | 299.3 |

|    |  |       |       |       |       |       |       |
|----|--|-------|-------|-------|-------|-------|-------|
| 35 |  | 258.6 | 275.6 | 253.4 | 225.3 | 268.1 | 287.9 |
| 36 |  | 234.7 | 234.8 | 213.2 | 215.2 | 225.9 | 244.0 |
| 37 |  | 255.2 | 278.8 | 256.6 | 258.5 | 271.3 | 292.0 |
| 38 |  | 243.1 | 257.5 | 235.0 | 237.5 | 249.2 | 268.6 |
| 39 |  | 266.9 | 277.4 | 255.6 | 257.5 | 270.5 | 290.3 |
| 40 |  | 257.7 | 272.0 | 250.9 | 252.7 | 265.4 | 284.2 |
| 41 |  | 254.8 | 277.6 | 256.5 | 258.3 | 271.1 | 290.4 |
| 42 |  | 263.6 | 278.2 | 256.9 | 258.8 | 271.3 | 291.0 |
| 43 |  | 260.2 | 271.1 | 250.3 | 251.8 | 264.3 | 284.4 |
| 44 |  | 248.1 | 251.7 | 229.1 | 230.9 | 241.9 | 263.4 |
| 45 |  | 268.2 | 288.6 | 267.5 | 269.9 | 281.6 | 303.0 |
| 46 |  | 259.4 | 265.2 | 244.0 | 245.5 | 285.5 | 275.5 |
| 47 |  | 266.5 | 287.6 | 267.1 | 269.0 | 281.6 | 301.9 |
| 48 |  | 255.2 | 266.7 | 243.9 | 245.8 | 259.0 | 276.6 |
| 49 |  | 266.9 | 289.3 | 267.2 | 270.5 | 279.4 | 306.7 |
| 50 |  | 265.3 | 289.6 | 267.9 | 269.8 | 282.7 | 304.4 |

|    |  |            |       |       |       |       |        |
|----|--|------------|-------|-------|-------|-------|--------|
| 51 |  | 270.3      | 292.1 | 271.2 | 273.2 | 285.9 | 307.1  |
| 52 |  | 263.6      | 292.7 | 271.9 | 273.9 | 286.6 | 307.9  |
| 53 |  | 282.4      | 289.1 | 268.2 | 270.1 | 283.0 | 303.4  |
| 54 |  | 260.7      | 287.9 | 264.9 | 267.7 | 278.9 | 301.3  |
| 55 |  | 416.7±5.4  | 463.2 | 413.4 | 417.4 | 425.1 | 469.3  |
| 56 |  | 331.0±10.5 | 326.1 | 320.6 | 322.5 | 332.4 | 356.5  |
| 57 |  | 320.5±20.9 | 321.4 | 313.1 | 316.4 | 327.2 | 357.7  |
| 58 |  | 304.6±8.4  | 287.7 | 270.8 | 274.2 | 281.7 | 304.1  |
| 59 |  | 303.7±8.4  | 345.8 | 289.6 | 293.1 | 300.4 | 225.0  |
| 60 |  | 298.3±8.4  | 288.5 | 261.8 | 265.6 | 274.7 | 292.7  |
| 61 |  | 298.7±8.4  | 294.3 | 273.3 | 276.8 | 283.7 | 307.4  |
| 62 |  | 300.8±8.4  | 288.6 | 262.8 | 266.6 | 274.6 | 294.8  |
| 63 |  | 332.2±8.4  | 332.2 | 320.7 | 323.1 | 332.6 | 366.7  |
| 64 |  | 208.4±8.4  | 203.0 | 192.7 | 194.2 | 205.2 | 216.7  |
| 65 |  | 240.6      | 253.2 | 232.5 | 234.5 | 274.6 | 262.9  |
| 66 |  | 255.2      | 272.7 | 251.6 | 253.4 | 266.1 | 284.09 |
| 67 |  | 155        | 164.7 | 126.3 | 129.7 | 140.6 | 137.3  |
| 68 |  | 145        | 169.3 | 130.4 | 133.7 | 144.9 | 142.5  |

|    |                                                                                   |     |       |       |       |       |       |
|----|-----------------------------------------------------------------------------------|-----|-------|-------|-------|-------|-------|
| 69 | 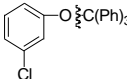 | 166 | 170.0 | 131.1 | 134.4 | 145.3 | 143.0 |
| 70 |  | 163 | 175.5 | 139.1 | 142.3 | 154.4 | 150.5 |
| 71 |  | 166 | 180.7 | 144.2 | 147.3 | 160.5 | 156.7 |
| 72 |  | 167 | 181.5 | 145.0 | 148.2 | 138.1 | 157.7 |

| No. | compounds                                                     | Exp        | B97-D | MPW1K | MPWB1K | MPWLYP1M | MPW1KCIS |
|-----|---------------------------------------------------------------|------------|-------|-------|--------|----------|----------|
| 1   | H <sub>3</sub> C-OCH <sub>3</sub>                             | 349.8±4.2  | 319.7 | 315.5 | 337.7  | 317.5    | 326.4.   |
| 2   | H <sub>3</sub> C-OC <sub>2</sub> H <sub>5</sub>               | 348.1±4.2  | 338.7 | 333.3 | 355.7  | 335.6    | 345.1    |
| 3   | C <sub>2</sub> H <sub>5</sub> -OCH <sub>3</sub>               | 353.1±5.4  | 320.5 | 319.4 | 341.0  | 318.0    | 326.3    |
| 4   | C <sub>2</sub> H <sub>3</sub> -OC <sub>2</sub> H <sub>3</sub> | 326.8±10.5 | 290.1 | 301.1 | 323.9  | 295.2    | 306.7    |
| 5   | C <sub>2</sub> H <sub>5</sub> -OC <sub>2</sub> H <sub>3</sub> | 272.8±10.5 | 230.2 | 238.4 | 262.7  | 233.1    | 242.5    |
| 6   | C <sub>2</sub> H <sub>5</sub> -OC <sub>2</sub> H <sub>5</sub> | 355.6±6.3  | 339.4 | 336.8 | 358.6  | 335.6    | 344.7    |
| 7   | nC <sub>3</sub> H <sub>7</sub> -OCH <sub>3</sub>              | 356.5±6.3  | 317.5 | 312.5 | 334.6  | 310.6    | 319.3    |
| 8   | H <sub>3</sub> C-OiC <sub>3</sub> H <sub>7</sub>              | 350.2±6.3  | 319.9 | 313.7 | 336.7  | 312.6    | 308.5    |
| 9   | iC <sub>3</sub> H <sub>7</sub> -OCH <sub>3</sub>              | 358.6±4.2  | 316.1 | 313.2 | 335.4  | 309.2    | 302.9    |
| 10  | C <sub>2</sub> H <sub>5</sub> -OC <sub>3</sub> H <sub>7</sub> | 358.4±8.4  | 317.8 | 317.3 | 338.5  | 313.1    | 322.2    |
| 11  | C <sub>3</sub> H <sub>7</sub> -OC <sub>2</sub> H <sub>5</sub> | 355.2±8.4  | 340.5 | 336.9 | 358.7  | 334.8    | 344.2    |
| 12  | C <sub>3</sub> H <sub>7</sub> -OC <sub>2</sub> H <sub>3</sub> | 274.1±10.5 | 231.4 | 238.5 | 262.8  | 232.4    | 242.2    |
| 13  | C <sub>4</sub> H <sub>9</sub> -OCH <sub>3</sub>               | 343.9±6.3  | 319.9 | 316.8 | 339.0  | 313.8    | 323.1    |
| 14  | H <sub>3</sub> C-OC <sub>4</sub> H <sub>9</sub>               | 353.1±6.3  | 317.6 | 314.9 | 337.0  | 313.9    | 323.5    |
| 15  | C <sub>2</sub> H <sub>5</sub> O-C <sub>3</sub> H <sub>7</sub> | 356.9±6.3  | 340.5 | 336.9 | 358.7  | 334.8    | 344.2    |
| 16  | C <sub>2</sub> H <sub>3</sub> -OC <sub>4</sub> H <sub>9</sub> | 419.2±8.4  | 384.8 | 388.9 | 407.7  | 384.5    | 395.7    |
| 17  | C <sub>4</sub> H <sub>9</sub> -OC <sub>2</sub> H <sub>3</sub> | 273.2±10.5 | 234.5 | 242.4 | 266.7  | 235.6    | 245.9    |

|    |                                                                                     |                 |       |       |       |       |       |
|----|-------------------------------------------------------------------------------------|-----------------|-------|-------|-------|-------|-------|
| 18 | $tC_4H_9-OC_2H_5$                                                                   | $347.3 \pm 6.3$ | 326.6 | 318.3 | 342.3 | 311.1 | 318.7 |
| 19 | $C_2H_5-OtC_4H_9$                                                                   | $349.6 \pm 6.3$ | 316.3 | 310.1 | 333.6 | 304.3 | 315.0 |
| 20 | $sC_4H_9-OnC_4H_9$                                                                  | $348.2 \pm 8.4$ | 322.2 | 323.5 | 344.4 | 368.2 | 378.2 |
| 21 | $sC_4H_9-OsC_4H_9$                                                                  | $359.4 \pm 8.4$ | 317.5 | 305.4 | 331.3 | 343.7 | 354.8 |
| 22 | $tC_4H_9-OtC_4H_9$                                                                  | $324.7 \pm 8.4$ | 289.1 | 270.0 | 300.4 | 301.0 | 275.0 |
| 23 | $nC_4H_9-OtC_4H_9$                                                                  | $351.9 \pm 8.4$ | 318.4 | 311.5 | 335.0 | 352.5 | 364.2 |
| 24 | $nC_4H_9O-tC_4H_9$                                                                  | $348.1 \pm 8.4$ | 308.1 | 303.7 | 328.2 | 340.1 | 314.6 |
| 25 | $iC_4H_9-OtC_4H_9$                                                                  | $353.1 \pm 8.4$ | 312.2 | 311.4 | 335.7 | 352.2 | 363.7 |
| 26 | $nC_5H_{11}-OtC_4H_9$                                                               | $349.4 \pm 8.4$ | 317.0 | 307.8 | 331.9 | 348.2 | 359.7 |
| 27 | 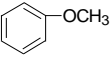   | $416.7 \pm 5.9$ | 390.5 | 391.2 | 412.1 | 446.8 | 456.9 |
| 28 |    | $268.6 \pm 7.1$ | 239.7 | 250.8 | 275.1 | 274.9 | 293.8 |
| 29 |   | 261.1           | 231.4 | 244.1 | 267.5 | 266.1 | 285.6 |
| 30 |  | 257.7           | 231.7 | 245.0 | 269.0 | 266.9 | 286.7 |
| 31 |  | 269.4           | 243.0 | 255.8 | 280.4 | 279.3 | 299.6 |
| 32 |  | 261.1           | 233.9 | 247.8 | 278.1 | 268.7 | 289.7 |
| 33 |  | 256.5           | 232.2 | 246.8 | 270.6 | 267.2 | 288.3 |
| 34 |  | 266.5           | 243.3 | 255.5 | 280.1 | 279.3 | 299.3 |
| 35 |  | 258.6           | 231.5 | 246.5 | 270.3 | 266.0 | 287.9 |
| 36 |  | 234.7           | 191.3 | 210.6 | 230.1 | 218.3 | 244.0 |
| 37 |  | 255.2           | 234.7 | 249.6 | 273.4 | 269.6 | 292.0 |
| 38 |  | 243.1           | 213.6 | 230.2 | 252.3 | 246.6 | 268.6 |

|    |                                                                                     |              |       |       |       |       |       |
|----|-------------------------------------------------------------------------------------|--------------|-------|-------|-------|-------|-------|
| 39 | 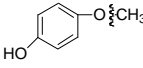   | 266.9        | 234.7 | 248.0 | 272.2 | 269.3 | 290.3 |
| 40 |    | 257.7        | 230.6 | 242.9 | 266.7 | 264.6 | 284.2 |
| 41 |    | 254.8        | 236.8 | 248.4 | 272.5 | 271.2 | 290.4 |
| 42 |    | 263.6        | 237.0 | 243.3 | 272.5 | 271.6 | 291.0 |
| 43 |    | 260.2        | 228.0 | 225.8 | 266.4 | 261.6 | 284.4 |
| 44 |    | 248.1        | 206.7 | 200.8 | 246.1 | 235.4 | 263.4 |
| 45 |    | 268.2        | 247.7 | 258.8 | 282.7 | 283.8 | 303.0 |
| 46 |    | 259.4        | 226.9 | 234.8 | 258.8 | 257.1 | 275.5 |
| 47 |  | 266.5        | 248.5 | 257.5 | 282.1 | 284.9 | 301.9 |
| 48 |  | 255.2        | 222.4 | 230.0 | 261.0 | 254.9 | 276.6 |
| 49 |  | 266.9        | 248.7 | 261.0 | 287.8 | 280.2 | 306.7 |
| 50 |  | 265.3        | 246.4 | 260.2 | 284.6 | 282.9 | 304.4 |
| 51 |  | 270.3        | 251.9 | 261.9 | 286.6 | 289.0 | 307.1 |
| 52 |  | 263.6        | 252.7 | 262.8 | 287.3 | 290.2 | 307.9 |
| 53 |  | 282.4        | 249.3 | 259.0 | 283.7 | 286.2 | 303.4 |
| 54 |  | 260.7        | 244.8 | 258.0 | 281.3 | 280.7 | 301.3 |
| 55 |  | 416.7 ± 5.4  | 406.6 | 401.8 | 423.5 | 459.6 | 469.3 |
| 56 |  | 331.0 ± 10.5 | 296.1 | 313.0 | 334.4 | 342.6 | 356.6 |

|    |  |             |       |       |       |       |       |
|----|--|-------------|-------|-------|-------|-------|-------|
| 57 |  | 320.5 ±20.9 | 294.4 | 305.0 | 328.3 | 341.9 | 357.7 |
| 58 |  | 304.6 ±8.4  | 259.1 | 260.8 | 281.8 | 292.1 | 304.1 |
| 59 |  | 303.7 ±8.4  | 283.4 | 278.9 | 300.2 | 312.6 | 225.0 |
| 60 |  | 298.3 ±8.4  | 260.1 | 252.1 | 285.6 | 288.6 | 292.7 |
| 61 |  | 298.7 ±8.4  | 265.4 | 264.4 | 284.6 | 292.2 | 307.4 |
| 62 |  | 300.8 ±8.4  | 259.1 | 253.7 | 275.9 | 278.3 | 294.8 |
| 63 |  | 332.2 ±8.4  | 300.1 | 314.6 | 336.0 | 339.4 | 366.7 |
| 64 |  | 208.4 ±8.4  | 169.1 | 185.1 | 208.0 | 192.6 | 316.7 |
| 65 |  | 240.6       | 211.8 | 224.5 | 249.6 | 234.2 | 262.9 |
| 66 |  | 255.2       | 230.6 | 243.1 | 267.5 | 264.4 | 284.9 |
| 67 |  | 155         | 118.7 | 121.2 | 147.2 | 103.3 | 137.3 |
| 68 |  | 145         | 122.5 | 125.7 | 151.7 | 107.9 | 142.5 |
| 69 |  | 166         | 124.0 | 126.2 | 150.2 | 108.6 | 143.0 |
| 70 |  | 163         | 134.8 | 132.6 | 160.3 | 118.8 | 150.3 |
| 71 |  | 166         | 138.9 | 138.0 | 166.5 | 123.8 | 156.7 |
| 72 |  | 167         | 132.7 | 139.0 | 166.6 | 125.5 | 157.7 |

| No. | compounds                                       | Exp        | CAM-B3LYP | B3LYP-D3 | B97-D3 | M06-2X | (wB97 opt) |
|-----|-------------------------------------------------|------------|-----------|----------|--------|--------|------------|
| 1   | H <sub>3</sub> C-OCH <sub>3</sub>               | 349.8 ±4.2 | 328.5     | 323.3    | 322.8  | 352.5  | 343.0      |
| 2   | H <sub>3</sub> C-OC <sub>2</sub> H <sub>5</sub> | 348.1 ±4.2 | 335.2     | 342.1    | 341.8  | 370.1  | 348.7      |

|    |                             |            |       |       |       |       |       |
|----|-----------------------------|------------|-------|-------|-------|-------|-------|
| 3  | <chem>C2H5-OCH3</chem>      | 353.1±5.4  | 332.4 | 327.1 | 322.1 | 358.3 | 347.7 |
| 4  | <chem>C2H3-OC2H3</chem>     | 326.8±10.5 | 309.1 | 305.6 | 295.6 | 330.7 | 315.6 |
| 5  | <chem>C2H5-OC2H3</chem>     | 272.8±10.5 | 247.7 | 243.8 | 233.6 | 274.7 | 239.6 |
| 6  | <chem>C2H5-OC2H5</chem>     | 355.6±6.3  | 338.6 | 345.7 | 340.8 | 375.7 | 353.6 |
| 7  | <chem>nC3H7-OCH3</chem>     | 356.5±6.3  | 325.5 | 322.1 | 317.7 | 353.0 | 342.8 |
| 8  | <chem>H3C-OiC3H7</chem>     | 350.2±6.3  | 326.3 | 322.9 | 321.1 | 337.2 | 343.1 |
| 9  | <chem>iC3H7-OCH3</chem>     | 358.6±4.2  | 327.0 | 323.1 | 315.2 | 341.2 | 345.9 |
| 10 | <chem>C2H5-OC3H7</chem>     | 358.4±8.4  | 329.5 | 324.7 | 318.4 | 356.3 | 345.7 |
| 11 | <chem>C3H7-OC2H5</chem>     | 355.2±8.4  | 338.5 | 345.9 | 341.2 | 376.0 | 353.5 |
| 12 | <chem>C3H7-OC2H3</chem>     | 274.1±10.5 | 247.7 | 244.1 | 234.0 | 274.9 | 256.5 |
| 13 | <chem>C4H9-OCH3</chem>      | 343.9±6.3  | 329.9 | 325.5 | 320.0 | 356.3 | 346.9 |
| 14 | <chem>H3C-OC4H9</chem>      | 353.1±6.3  | 327.3 | 322.3 | 320.0 | 352.3 | 342.0 |
| 15 | <chem>c2H5O-c3H7</chem>     | 356.9±6.3  | 338.5 | 345.9 | 241.2 | 376.0 | 353.5 |
| 16 | <chem>C2H3-OC4H9</chem>     | 419.2±8.4  | 399.9 | 394.8 | 388.9 | 420.0 | 409.2 |
| 17 | <chem>C4H9-OC2H3</chem>     | 273.2±10.5 | 251.7 | 247.7 | 237.0 | 278.1 | 258.2 |
| 18 | <chem>tC4H9-OC2H5</chem>    | 347.3±6.3  | 321.8 | 332.3 | 322.7 | 368.7 | 340.2 |
| 19 | <chem>C2H5-OtC4H9</chem>    | 349.6±6.3  | 323.1 | 321.8 | 314.9 | 353.1 | 337.6 |
| 20 | <chem>sC4H9-OnC4H9</chem>   | 348.2±8.4  | 335.8 | 329.9 | 322.5 | 418.9 | 351.7 |
| 21 | <chem>sC4H9-OCsC4H9</chem>  | 359.4±8.4  | 319.3 | 322.7 | 313.7 | 414.6 | 346.1 |
| 22 | <chem>tC4H9-OtC4H9</chem>   | 324.7±8.4  | 285.6 | 291.5 | 280.4 | 381.5 | 317.5 |
| 23 | <chem>nC4H9-OtC4H9</chem>   | 351.9±8.4  | 324.4 | 323.3 | 315.9 | 410.3 | 347.5 |
| 24 | <chem>nC4H9O-tC4H9</chem>   | 348.1±8.4  | 317.8 | 315.6 | 304.0 | 41.0  | 344.2 |
| 25 | <chem>iC4H9-OtC4H9</chem>   | 353.1±8.4  | 324.3 | 325.0 | 318.1 | 412.6 | 346.1 |
| 26 | <chem>nC5H11-OtC4H9</chem>  | 349.4±8.4  | 341.2 | 346.5 | 338.6 | 407.6 | 336.2 |
| 27 | <chem>c1ccc(OCH3)cc1</chem> | 416.7±5.9  | 403.0 | 400.7 | 393.9 | 493.9 | 418.7 |
| 28 | <chem>c1ccc(OCC)cc1</chem>  | 268.6±7.1  | 255.2 | 251.6 | 244.1 | 336.5 | 265.5 |
| 29 | <chem>Fc1ccc(OCC)cc1</chem> | 261.1      | 248.5 | 244.6 | 235.8 | 326.7 | 258.0 |



|    |                                                                                     |       |       |       |       |       |       |
|----|-------------------------------------------------------------------------------------|-------|-------|-------|-------|-------|-------|
| 30 | 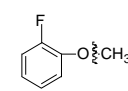   | 257.7 | 249.4 | 245.5 | 236.1 | 327.9 | 259.6 |
| 31 |    | 269.4 | 260.4 | 256.1 | 247.4 | 342.6 | 271.0 |
| 32 |    | 261.1 | 252.1 | 247.5 | 238.1 | 331.8 | 262.6 |
| 33 |    | 256.5 | 251.0 | 246.9 | 236.9 | 330.4 | 261.5 |
| 34 |    | 266.5 | 260.2 | 256.2 | 247.7 | 342.6 | 270.9 |
| 35 |    | 258.6 | 248.6 | 256.3 | 258.4 | 330.0 | 232.9 |
| 36 |    | 234.7 | 210.6 | 205.9 | 195.2 | 280.5 | 233.3 |
| 37 |   | 255.2 | 253.5 | 248.6 | 239.1 | 335.4 | 265.0 |
| 38 |  | 243.1 | 234.2 | 229.7 | 217.8 | 309.0 | 244.5 |
| 39 |  | 266.9 | 252.1 | 247.9 | 239.0 | 333.4 | 263.1 |
| 40 |  | 257.7 | 246.8 | 243.0 | 235.0 | 326.3 | 257.6 |
| 41 |  | 254.8 | 252.2 | 249.2 | 241.0 | 330.0 | 256.4 |
| 42 |  | 263.6 | 252.8 | 249.1 | 241.3 | 333.9 | 263.4 |
| 43 |  | 260.2 | 246.1 | 241.5 | 232.4 | 324.6 | 243.2 |
| 44 |  | 248.1 | 226.8 | 221.9 | 210.5 | 300.7 | 238.6 |
| 45 |  | 268.2 | 262.8 | 259.6 | 252.1 | 283.6 | 272.4 |

|    |                                                                                     |            |       |       |       |       |       |
|----|-------------------------------------------------------------------------------------|------------|-------|-------|-------|-------|-------|
| 46 | 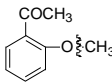   | 259.4      | 238.2 | 236.6 | 230.6 | 256.3 | 264.0 |
| 47 |    | 266.5      | 262.6 | 259.8 | 252.9 | 283.9 | 272.4 |
| 48 |    | 255.2      | 240.7 | 236.4 | 226.8 | 320.5 | 252.0 |
| 49 |    | 266.9      | 268.3 | 265.3 | 257.8 | 260.1 | 278.1 |
| 50 |    | 265.3      | 264.3 | 260.3 | 251.1 | 255.5 | 274.5 |
| 51 |    | 270.3      | 267.1 | 263.9 | 256.3 | 258.6 | 276.8 |
| 52 |    | 263.6      | 267.9 | 264.8 | 257.0 | 259.5 | 277.4 |
| 53 |  | 282.4      | 264.3 | 261.2 | 253.4 | 346.4 | 274.1 |
| 54 |  | 260.7      | 262.8 | 260.3 | 249.5 | 344.1 | 274.0 |
| 55 |  | 416.7±5.4  | 402.5 | 415.1 | 409.3 | 416.6 | 419.8 |
| 56 |  | 331.0±10.5 | 316.1 | 313.8 | 302.2 | 402.7 | 341.5 |
| 57 |  | 320.5±20.9 | 313.1 | 312.5 | 300.0 | 390.9 | 305.4 |
| 58 |  | 304.6±8.4  | 274.7 | 269.6 | 259.5 | 358.2 | 293.4 |
| 59 |  | 303.7±8.4  | 281.0 | 292.2 | 283.7 | 290.0 | 300.2 |
| 60 |  | 298.3±8.4  | 264.7 | 268.5 | 258.9 | 298.8 | 289.7 |
| 61 |  | 298.7±8.4  | 277.0 | 275.8 | 265.3 | 363.7 | 296.6 |
| 62 |  | 300.8±8.4  | 266.7 | 268.2 | 256.9 | 355.2 | 290.2 |
| 63 |  | 332.2±8.4  | 317.8 | 320.2 | 306.5 | 407.4 | 329.0 |

|    |                                                                                     |           |       |       |       |       |       |
|----|-------------------------------------------------------------------------------------|-----------|-------|-------|-------|-------|-------|
| 64 | 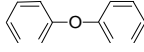   | 208.4±8.4 | 190.5 | 186.0 | 172.1 | 270.2 | 201.8 |
| 65 |    | 240.6     | 228.1 | 225.4 | 216.2 | 305.6 | 237.1 |
| 66 |    | 255.2     | 245.2 | 243.6 | 234.9 | 327.1 | 256.7 |
| 67 |    | 155       | 157.1 | 162.6 | 148.4 | 223.0 | 159.8 |
| 68 |    | 145       | 133.6 | 147.7 | 128.1 | 162.7 | 161.2 |
| 69 |    | 166       | 134.2 | 149.4 | 129.9 | 165.6 | 161.6 |
| 70 |    | 163       | 141.0 | 155.6 | 138.4 | 170.3 | 166.8 |
| 71 |   | 166       | 146.3 | 160.3 | 142.6 | 146.7 | 172.1 |
| 72 |  | 167       | 147.4 | 161.7 | 143.6 | 147.2 | 154.1 |

Note: The values of (wb97 opt) are calculated at wb97/6-311++G(2df,2p)//wb97/6-31+G(d) level.
